# Supplementary material
Source: PubMed Central journal article supplement (PMC3103190)
Supplement: es200665d_si_001.pdf [file es200665d_si_001.pdf]

XUEWU LIU, MARK C. PATSAVAS, ROBERT H. BYRNE

**Purification and Characterization of meta Cresol Purple for Spectrophotometric Seawater pH Measurements**

*College of Marine Science, University of South Florida, 140 7<sup>th</sup> 4 Avenue South,  
St. Petersburg, FL 33701, USA*

\*Corresponding author. Tel: +1 727 553 1508; Fax: +1 727 553 1189.

*E-mail address:* [byrne@marine.usf.edu](mailto:byrne@marine.usf.edu) (R.H. Byrne)

Environmental Science and Technology

April 25, 2011

Number of pages: 10

Number of tables: 4

Number of figures: 5

**TABLE S1. mCP  $e_3/e_2$  values at different temperatures and salinities**

| $T$<br>(S = 35) | $e_3/e_2$ | S  | $e_3/e_2$<br>(T = 298.15 K) |
|-----------------|-----------|----|-----------------------------|
| 278.21          | 0.05164   | 20 | 0.05518                     |
| 278.21          | 0.05168   | 20 | 0.05516                     |
| 278.21          | 0.05174   | 20 | 0.05513                     |
| 278.21          | 0.05175   | 20 | 0.05512                     |
| 283.24          | 0.05275   | 25 | 0.05584                     |
| 283.24          | 0.05275   | 25 | 0.0559                      |
| 283.24          | 0.05277   | 25 | 0.0559                      |
| 283.24          | 0.05283   | 25 | 0.05587                     |
| 283.24          | 0.05294   | 30 | 0.0563                      |
| 288.24          | 0.05422   | 30 | 0.05632                     |
| 288.24          | 0.05423   | 30 | 0.05636                     |
| 288.24          | 0.05423   | 30 | 0.05633                     |
| 288.25          | 0.05427   | 30 | 0.05631                     |
| 293.48          | 0.05554   | 30 | 0.05631                     |
| 293.47          | 0.05555   | 30 | 0.05633                     |
| 293.48          | 0.05556   | 30 | 0.05628                     |
| 293.48          | 0.0556    | 30 | 0.0563                      |
| 293.48          | 0.05566   | 35 | 0.05684                     |
| 293.48          | 0.05566   | 35 | 0.05686                     |
| 298.23          | 0.05684   | 35 | 0.05688                     |
| 298.23          | 0.05685   | 35 | 0.05689                     |
| 298.23          | 0.05687   | 35 | 0.05687                     |
| 298.23          | 0.05688   | 40 | 0.05737                     |
| 303.31          | 0.05806   | 40 | 0.0573                      |
| 303.33          | 0.05808   | 40 | 0.05738                     |
| 303.34          | 0.05818   | 40 | 0.05734                     |
| 303.31          | 0.05822   | 40 | 0.05736                     |
| 308.39          | 0.05948   | 40 | 0.05729                     |
| 308.32          | 0.05949   |    |                             |
| 308.32          | 0.05949   |    |                             |
| 308.29          | 0.05951   |    |                             |
| 308.37          | 0.05959   |    |                             |

**TABLE S2. mCP  $K_I$  at different temperatures in 0.7 m NaCl**

| $T$    | $K_I$         |
|--------|---------------|
| 279.45 | 0.0211±0.0002 |
| 288.75 | 0.0246±0.0002 |
| 298.15 | 0.0299±0.0001 |
| 307.95 | 0.0384±0.0015 |

**TABLE S3. mCP  $_{578A/434A}$  and  $e_1$  as a function of temperature at pH 4.5**

| $T$    | $_{578A/434A}$ | $e_1$   |
|--------|----------------|---------|
| 279.20 | 0.00570        | 0.00485 |
| 281.21 | 0.00580        | 0.00494 |
| 288.14 | 0.00610        | 0.00525 |
| 288.24 | 0.00605        | 0.00526 |
| 288.84 | 0.00610        | 0.00529 |
| 297.88 | 0.00645        | 0.00569 |
| 298.18 | 0.00650        | 0.00571 |
| 298.18 | 0.00652        | 0.00571 |
| 307.85 | 0.00700        | 0.00614 |
| 307.89 | 0.00700        | 0.00615 |
| 308.12 | 0.00702        | 0.00616 |

**TABLE S4. Comparison of two assessments of pH (total hydrogen concentration scale) in 0.04 mol (kg-H<sub>2</sub>O)<sup>-1</sup> Tris buffer in synthetic seawater. Residual = expected pH (eq 6) minus pH as determined by mCP absorbance ratio *R* (eq 18).**

| <i>S</i> | <i>T</i> | <i>R</i> | pH <sub>T</sub> (TRIS)<br>(eq 6) | pH <sub>T</sub> (mCP)<br>(eq 18) | Residual |
|----------|----------|----------|----------------------------------|----------------------------------|----------|
| 20       | 278.11   | 4.6082   | 8.7180                           | 8.7177                           | 0.00029  |
| 20       | 278.11   | 4.6079   | 8.7180                           | 8.7177                           | 0.00028  |
| 20       | 288.17   | 3.1142   | 8.3818                           | 8.3819                           | -0.00010 |
| 20       | 288.17   | 3.1147   | 8.3817                           | 8.3819                           | -0.00022 |
| 20       | 288.20   | 3.1107   | 8.3807                           | 8.3809                           | -0.00018 |
| 20       | 288.23   | 3.1078   | 8.3799                           | 8.3801                           | -0.00023 |
| 20       | 288.27   | 3.1034   | 8.3786                           | 8.3789                           | -0.00029 |
| 20       | 298.12   | 2.1213   | 8.0701                           | 8.0700                           | 0.00002  |
| 20       | 298.16   | 2.1178   | 8.0690                           | 8.0688                           | 0.00016  |
| 20       | 298.19   | 2.1156   | 8.0680                           | 8.0679                           | 0.00008  |
| 20       | 298.21   | 2.1140   | 8.0674                           | 8.0673                           | 0.00009  |
| 20       | 298.25   | 2.1109   | 8.0662                           | 8.0661                           | 0.00005  |
| 20       | 298.25   | 2.1104   | 8.0661                           | 8.0660                           | 0.00013  |
| 20       | 307.77   | 1.4762   | 7.7835                           | 7.7834                           | 0.00012  |
| 20       | 307.80   | 1.4743   | 7.7827                           | 7.7824                           | 0.00023  |
| 20       | 307.89   | 1.4697   | 7.7799                           | 7.7799                           | 0.00001  |
| 20       | 307.91   | 1.4690   | 7.7794                           | 7.7794                           | -0.00001 |
| 20       | 308.00   | 1.4637   | 7.7767                           | 7.7767                           | 0.00007  |
| 20       | 308.06   | 1.4607   | 7.7751                           | 7.7750                           | 0.00008  |
| 20       | 308.07   | 1.4594   | 7.7747                           | 7.7745                           | 0.00023  |
| 30       | 278.17   | 4.9437   | 8.7399                           | 8.7396                           | 0.00027  |
| 30       | 278.17   | 4.9436   | 8.7399                           | 8.7396                           | 0.00028  |

---

|    |        |        |        |        |          |
|----|--------|--------|--------|--------|----------|
| 30 | 278.17 | 4.9441 | 8.7399 | 8.7396 | 0.00022  |
| 30 | 278.17 | 4.9493 | 8.7399 | 8.7403 | -0.00038 |
| 30 | 278.18 | 4.9426 | 8.7398 | 8.7394 | 0.00032  |
| 30 | 288.12 | 3.3913 | 8.4033 | 8.4026 | 0.00073  |
| 30 | 288.12 | 3.3907 | 8.4033 | 8.4025 | 0.00083  |
| 30 | 288.13 | 3.3932 | 8.4028 | 8.4027 | 0.00009  |
| 30 | 288.14 | 3.3944 | 8.4027 | 8.4028 | -0.00016 |
| 30 | 288.23 | 3.3877 | 8.3998 | 8.4007 | -0.00090 |
| 30 | 288.23 | 3.3840 | 8.3997 | 8.4001 | -0.00039 |
| 30 | 288.25 | 3.3826 | 8.3991 | 8.3996 | -0.00051 |
| 30 | 288.26 | 3.3836 | 8.3988 | 8.3996 | -0.00083 |
| 30 | 298.17 | 2.3260 | 8.0832 | 8.0834 | -0.00016 |
| 30 | 298.18 | 2.3265 | 8.0831 | 8.0834 | -0.00033 |
| 30 | 298.18 | 2.3259 | 8.0829 | 8.0832 | -0.00030 |
| 30 | 298.20 | 2.3241 | 8.0824 | 8.0826 | -0.00025 |
| 30 | 298.20 | 2.3233 | 8.0823 | 8.0824 | -0.00008 |
| 30 | 298.20 | 2.3235 | 8.0823 | 8.0825 | -0.00016 |
| 30 | 298.20 | 2.3244 | 8.0823 | 8.0827 | -0.00040 |
| 30 | 308.07 | 1.6139 | 7.7836 | 7.7839 | -0.00033 |
| 30 | 308.07 | 1.6141 | 7.7836 | 7.7840 | -0.00040 |
| 30 | 308.08 | 1.6142 | 7.7834 | 7.7839 | -0.00052 |
| 30 | 308.09 | 1.6128 | 7.7831 | 7.7834 | -0.00029 |
| 30 | 308.09 | 1.6130 | 7.7831 | 7.7834 | -0.00037 |
| 30 | 308.12 | 1.6093 | 7.7822 | 7.7820 | 0.00025  |
| 30 | 308.13 | 1.6117 | 7.7821 | 7.7826 | -0.00056 |
| 30 | 308.14 | 1.6109 | 7.7816 | 7.7822 | -0.00057 |
| 35 | 278.22 | 5.0751 | 8.7518 | 8.7518 | 0.00000  |
| 35 | 278.22 | 5.0800 | 8.7518 | 8.7524 | -0.00056 |

---

---

|    |        |        |        |        |          |
|----|--------|--------|--------|--------|----------|
| 35 | 278.23 | 5.0814 | 8.7518 | 8.7526 | -0.00074 |
| 35 | 278.23 | 5.0759 | 8.7517 | 8.7519 | -0.00016 |
| 35 | 278.23 | 5.0816 | 8.7516 | 8.7525 | -0.00087 |
| 35 | 278.23 | 5.0772 | 8.7516 | 8.7520 | -0.00037 |
| 35 | 278.23 | 5.0774 | 8.7516 | 8.7520 | -0.00039 |
| 35 | 278.41 | 5.0387 | 8.7455 | 8.7452 | 0.00026  |
| 35 | 278.41 | 5.0404 | 8.7455 | 8.7454 | 0.00007  |
| 35 | 278.41 | 5.0402 | 8.7455 | 8.7454 | 0.00009  |
| 35 | 278.41 | 5.0382 | 8.7455 | 8.7451 | 0.00032  |
| 35 | 278.41 | 5.0426 | 8.7455 | 8.7456 | -0.00018 |
| 35 | 278.41 | 5.0448 | 8.7455 | 8.7459 | -0.00044 |
| 35 | 278.41 | 5.0430 | 8.7454 | 8.7457 | -0.00025 |
| 35 | 278.42 | 5.0402 | 8.7451 | 8.7452 | -0.00013 |
| 35 | 288.16 | 3.4962 | 8.4137 | 8.4128 | 0.00092  |
| 35 | 288.16 | 3.4958 | 8.4137 | 8.4127 | 0.00096  |
| 35 | 288.17 | 3.4961 | 8.4136 | 8.4127 | 0.00086  |
| 35 | 288.17 | 3.4943 | 8.4135 | 8.4124 | 0.00109  |
| 35 | 298.16 | 2.4076 | 8.0931 | 8.0922 | 0.00092  |
| 35 | 298.17 | 2.4075 | 8.0931 | 8.0922 | 0.00090  |
| 35 | 298.17 | 2.4078 | 8.0931 | 8.0922 | 0.00084  |
| 35 | 308.11 | 1.6729 | 7.7895 | 7.7892 | 0.00036  |
| 35 | 308.13 | 1.6713 | 7.7889 | 7.7885 | 0.00045  |
| 35 | 308.14 | 1.6710 | 7.7887 | 7.7883 | 0.00045  |
| 35 | 308.14 | 1.6708 | 7.7886 | 7.7882 | 0.00045  |
| 35 | 308.15 | 1.6705 | 7.7886 | 7.7881 | 0.00047  |
| 40 | 278.11 | 5.2013 | 8.7707 | 8.7698 | 0.00089  |
| 40 | 278.11 | 5.2049 | 8.7706 | 8.7701 | 0.00044  |
| 40 | 278.11 | 5.2079 | 8.7706 | 8.7705 | 0.00010  |

---

---

|    |        |        |        |        |          |
|----|--------|--------|--------|--------|----------|
| 40 | 278.11 | 5.2018 | 8.7705 | 8.7698 | 0.00076  |
| 40 | 278.12 | 5.2085 | 8.7704 | 8.7705 | -0.00008 |
| 40 | 278.12 | 5.2092 | 8.7704 | 8.7706 | -0.00015 |
| 40 | 288.67 | 3.5331 | 8.4101 | 8.4108 | -0.00070 |
| 40 | 288.67 | 3.5332 | 8.4101 | 8.4108 | -0.00073 |
| 40 | 288.67 | 3.5331 | 8.4100 | 8.4107 | -0.00075 |
| 40 | 288.67 | 3.5326 | 8.4100 | 8.4107 | -0.00068 |
| 40 | 298.16 | 2.4864 | 8.1045 | 8.1049 | -0.00033 |
| 40 | 298.23 | 2.4797 | 8.1023 | 8.1026 | -0.00032 |
| 40 | 298.24 | 2.4793 | 8.1021 | 8.1024 | -0.00034 |
| 40 | 298.24 | 2.4780 | 8.1018 | 8.1020 | -0.00024 |
| 40 | 298.25 | 2.4775 | 8.1017 | 8.1019 | -0.00019 |
| 40 | 308.44 | 1.7063 | 7.7886 | 7.7882 | 0.00036  |
| 40 | 308.44 | 1.7078 | 7.7886 | 7.7887 | -0.00006 |
| 40 | 308.44 | 1.7083 | 7.7886 | 7.7888 | -0.00022 |
| 40 | 308.44 | 1.7068 | 7.7885 | 7.7883 | 0.00016  |
| 40 | 308.45 | 1.7064 | 7.7883 | 7.7881 | 0.00016  |
| 40 | 308.50 | 1.7060 | 7.7869 | 7.7875 | -0.00052 |

---

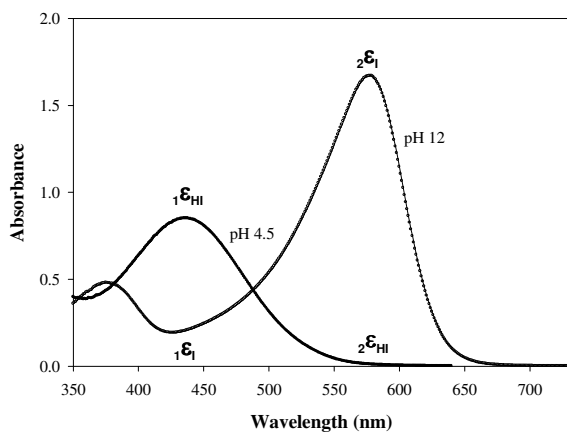

**FIGURE S1. Spectra of mCP at pH =4.5 and pH =12.**

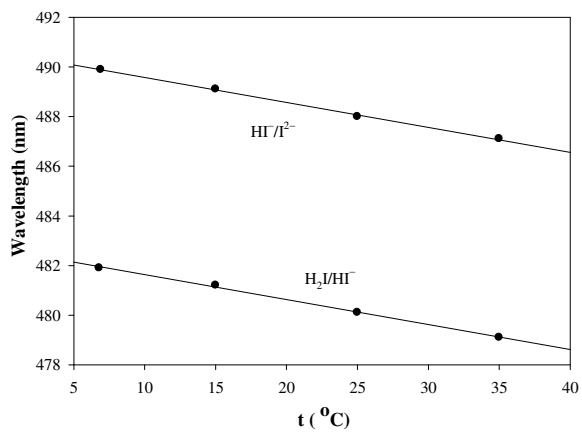

**FIGURE S2. Isosbestic point wavelengths of H<sub>2</sub>I/HI<sup>-</sup> and HI<sup>-</sup>/I<sup>2-</sup> as a function of temperature.**



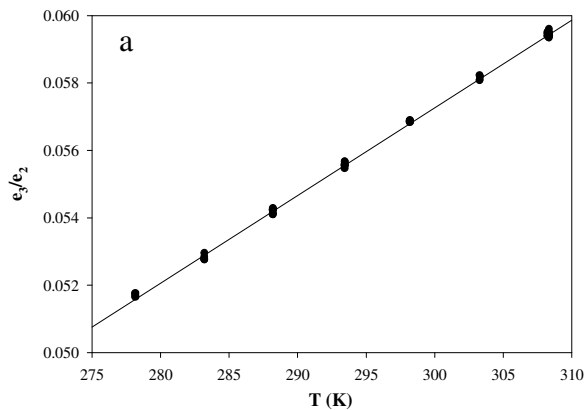

**FIGURE S3a.** mCP  $e_3/e_2$  as a function of temperature at pH 12 in modified synthetic seawater.

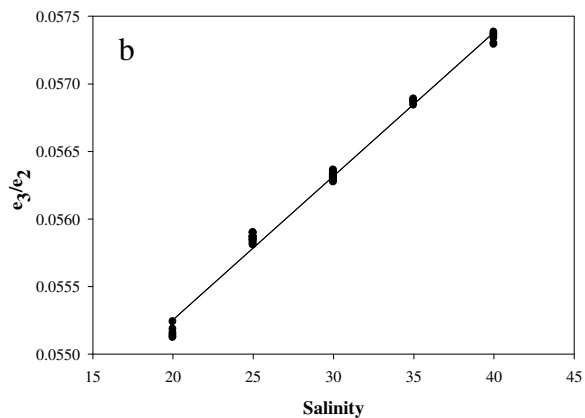

**FIGURE S3b.** mCP  $e_3/e_2$  as a function of salinity (298.15 K) at pH 12 in modified synthetic seawater.

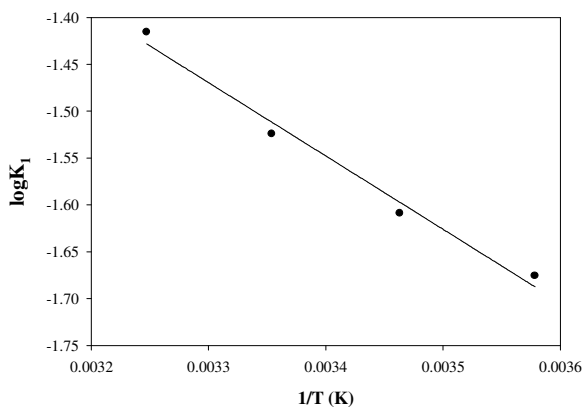

**FIGURE S4.** mCP  $K_1$  as a function of temperature in 0.7 m NaCl.

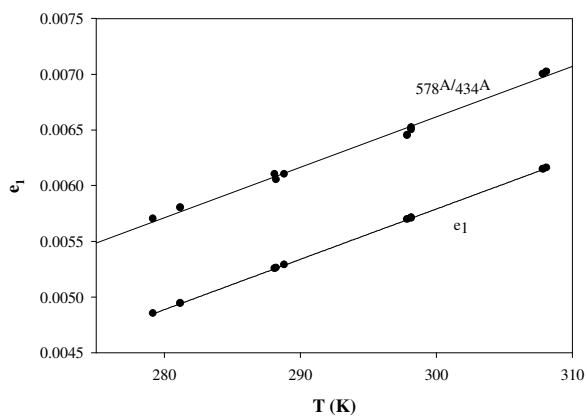

**FIGURE S5.** mCP  $A_{578}/A_{434}$  and  $e_1$  as a function of temperature in a strongly buffered solution of 0.7 m NaCl at pH 4.5.
